# Supplementary material
Source: publisher site journal article supplement (https://www.dovepress.com/article/471000)
Supplement: Supplementary file 1 [file get_supplementary_file.php]

Table S1 Preferred Reporting Items for Systematic Reviews and Meta-Analyses Extension for Scoping Reviews (PRISMA-ScR) Checklist

| Section | Item | PRISMA-ScR Checklist Item | Reported On Page |
| --- | --- | --- | --- |
| Title | | | |
| Title | 1 | Identify the report as a scoping review. | Page 1 |
| Abstract | | | |
| Structured summary | 2 | Provide a structured summary that includes (as applicable): background, objectives, eligibility criteria, sources of evidence, charting methods, results, and conclusions that relate to the review questions and objectives. | Page 1, 2 |
| Introduction | | | |
| Rationale | 3 | Describe the rationale for the review in the context of what is already known. Explain why the review questions/objectives lend themselves to a scoping review approach. | Page 4 |
| Objectives | 4 | Provide an explicit statement of the questions and objectives being addressed with reference to their key elements (eg, population or participants, concepts, and context) or other relevant key elements used to conceptualize the review questions and/or objectives. | Page 4 |
| Methods | | | |
| Protocol and registration | 5 | Indicate whether a review protocol exists; state if and where it can be accessed (eg, a Web address); and if available, provide registration information, including the registration number. | Page 5 |
| Eligibility criteria | 6 | Specify characteristics of the sources of evidence used as eligibility criteria (eg, years considered, language, and publication status), and provide a rationale. | Page 6 |
| Information sources | 7 | Describe all information sources in the search (eg, databases with dates of coverage and contact with authors to identify additional sources), as well as the date the most recent search was executed. | Page 5 |
| Search | 8 | Present the full electronic search strategy for at least 1 database, including any limits used, such that it could be repeated. | Page 6 |
| Selection of sources of evidence | 9 | State the process for selecting sources of evidence (ie, screening and eligibility) included in the scoping review. | Page 6 |
| Data charting process | 10 | Describe the methods of charting data from the included sources of evidence (eg, calibrated forms or forms that have been tested by the team before their use, and whether data charting was done independently or in duplicate) and any processes for obtaining and confirming data from investigators. | Page 6 |
| Data items | 11 | List and define all variables for which data were sought and any assumptions and simplifications made. | Page 6 |
| Critical appraisal of individual sources of evidence | 12 | If done, provide a rationale for conducting a critical appraisal of included sources of evidence; describe the methods used and how this information was used in any data synthesis (if appropriate). | NONE |
| Synthesis of results | 13 | Describe the methods of handling and summarizing the data that were charted. | Page 7 |
| Results | | | |
| Selection of sources of evidence | 14 | Give numbers of sources of evidence screened, assessed for eligibility, and included in the review, with reasons for exclusions at each stage, ideally using a flow diagram. | Page 7, Figure 1 |
| Characteristics of sources of evidence | 15 | For each source of evidence, present characteristics for which data were charted and provide the citations. | Page 7 |
| Critical appraisal within sources of evidence | 16 | If done, present data on critical appraisal of included sources of evidence (see item 12). | NONE |
| Results of individual sources of evidence | 17 | For each included source of evidence, present the relevant data that were charted that relate to the review questions and objectives. | Page 7, Table 2 |
| Synthesis of results | 18 | Summarize and/or present the charting results as they relate to the review questions and objectives. | Page 7, Table 3 |
| Discussion | | | |
| Summary of evidence | 19 | Summarize the main results (including an overview of concepts, themes, and types of evidence available), link to the review questions and objectives, and consider the relevance to key groups. | Page 8, 9, 10, 11 |
| Limitations | 20 | Discuss the limitations of the scoping review process. | Page 10, 11 |
| Conclusions | 21 | Provide a general interpretation of the results with respect to the review questions and objectives, as well as potential implications and/or next steps. | Page 12 |
| Funding | | | |
| Funding | 22 | Describe sources of funding for the included sources of evidence, as well as sources of funding for the scoping review. Describe the role of the funders of the scoping review. | Page 13 |

Abbreviations: PRISMA-ScR, Preferred Reporting Items for Systematic reviews and Meta-Analyses extension for Scoping Reviews.

Table S2 Basic Characteristics of Active Aging Assessment Tool

| No. | Author, Year | Tool | Study level | Theoretical foundation | Number of items |
| --- | --- | --- | --- | --- | --- |
| 1 | Hu, (2012)23 | The Elderly Active Ageing Assessment Questionnaire | Macro-Level | Active Ageing Interaction Model | 21 |
| 2 | Buys and Miller, (2012)24 | the Australian Active Ageing | Macro-Level | the World Health Organization’s theoretical framework | 177 |
| 3 | Zaidi et al., (2012)8 | Active Ageing Index | Macro-Level | WHO policy framework on "active ageing"; and the innovative addition of a fourth dimension of supportive environments in conjunction with the expert group. | 22 |
| 4 | Paúl et al., (2012)25 | WHO Active Ageing Model | Macro-Level | the World Health Organization’s theoretical framework | 20 |
| 5 | Tareque et al,. (2014)26 | Active Aging Index | Macro-Level | the Active Aging Taskforce of the Western Australian Government and the determinants of active aging by WHO | 15 |
| 6 | Thanakwang et al., (2014)12 | Active Aging for Thai Adults | Macro-Level | Conducting focus groups and in-depth interviews to identify dimensions of active ageing | 36 |
| 7 | Marsillas et al., (2017)27 | A Model of Active Ageing | Individual Level | Social domain | 57 |
| 8 | Zhang, (2017)28 | Chinese Version of the Active Ageing Index | Macro-Level | Thanakwang's Positive Ageing Scale | 36 |
| 9 | Gonçalves et al., (2017)29 | the Selfie Aging Index | Individual Level | the Biopsychosocial Assessment Model | / |
| 10 | Mohammadi et al., (2018)30 | Active Aging Measurement Instrument | Macro-Level | the study was based on the grounded theory of qualitative research aimed at achieving the native theoretical model of active aging | 40 |
| 11 | Yang, (2018)31 | Indicator system for active ageing | Individual Level | the World Health Organization’s theoretical framework | 23 |

Basic Characteristics of Active Aging Assessment Tool (Continue)

| No. | Author, Year | Tool | Study level | Theoretical foundation | Number of items |
| --- | --- | --- | --- | --- | --- |
| 12 | Rantanen et al., (2019)32 | the University of Jyvaskyla Active Aging Scale | Macro-Level | the Activities and Participation categories of the International Classification of Functioning, Disability and Health | 17 |
| 13 | Hsu et al., (2019)33 | Taiwan’s Active Aging Index | Macro-Level | the Active Aging Index of the European Union | 33 |
| 14 | Xie, (2019)34 | Active Ageing Model | Macro-Level | the World Health Organization’s theoretical framework | 45 |
| 15 | Li, (2020)35 | Active Ageing Measurement Tool | Macro-Level | Based on the results of the evaluation of the framework design, indicator setting and construction methodology of the Active Ageing Measurement Instrument globally | 23 |
| 16 | Pham et al.,(2020a)36 | Vietnam’s version of the Active Aging Index | Macro-Level | the World Health Organization’s theoretical framework | 24 |
| 17 | Pham et al.,(2020b)37 | Vietnam’s version of the Active Aging Index | Macro-Level | the World Health Organization’s theoretical framework | 22 |
| 18 | Steinmayr et al., (2020)38 | SHARE-Active-Ageing-Index | Individual Level | the World Health Organization’s theoretical framework | 59 |
| 19 | Oliveira, (2020)39 | a Structural Model of Active Ageing | Macro-Level | the World Health Organization’s theoretical framework | 24 |
| 20 | Haque, (2022)40 | Active Aging Index | Macro-Level | the World Health Organization’s theoretical framework | 18 |
| 21 | Bibi et al.,(2023)41 | The Active Aging Scale-Pak | Macro-Level | Thanakwang's Active Ageing Scale | 34 |
| 22 | Keeratisiroj et al., (2023)42 | Self-Active Aging Index | Macro-Level | the World Health Organization’s theoretical framework | 28 |

Table S3 Basic Characteristics of Active Aging Assessment Tool

| No. | Author, Year | Dimensions/Factors | Age of participants | Data sources and years |
| --- | --- | --- | --- | --- |
| 1 | Hu, (2012)23 | Four dimensions: Health; Life satisfaction; Community involvement; Family support | >60 | Local Sample Survey (2012) |
| 2 | Buys and Miller, (2012)24 | Ten dimensions: Paid and voluntary work; Learning; Social; Spiritual; Emotional; Health; Vision; Home; Life events; Demographics | 50-90 | the membership database of an Australian-wide senior’s organization (2012) |
| 3 | Zaidi et al., (2012)8 | Four dimensions: Employment; Participation in society; Independent; healthy and secure living; Capacity and enabling environment for active ageing | >55 | EU-SILC, EU-LFS, EQLS（2010） |
| 4 | Paúl et al., (2012)25 | Four dimensions: Health; Psychological; Cognitive; Biological; Social relationship; Personality | 55-101 | Local Sample Survey (2012) |
| 5 | Tareque et al,. (2014)26 | three dimensions: Health; Community participation; Security dimension | >60 | Local Sample Survey (2009) |
| 6 | Thanakwang et al., (2014)12 | Seven factors: Being self-reliant; Being actively engaged with society; Developing spiritual wisdom; Building up financial security; Maintaining a healthy lifestyle; Engaging in active learning; Strengthening family ties to ensure care in later life | 60-96 | National Sample Survey (2013) |
| 7 | Marsillas et al., (2017)27 | Ten dimensions: Health; Functionality; Cognitive status; Affective status; Social status; ICT use; Lifelong learning; Employment; Social participation; Leisure activities; Coping styles; Life satisfaction; Socio-demographic | 60-94 | Local Sample Survey (2017) |
| 8 | Zhang, (2017)28 | Seven dimensions: Self-care ability; Active learning and integrate into society; Build economic security; Develop spiritual wisdom; Maintain a healthy lifestyle; Actively contribute to society; Pass on filial piety by example | 67.86±7.45 | Local Sample Survey (2014) |

Basic Characteristics of Active Aging Assessment Tool (Continue)

| No. | Author, Year | Dimensions/Factors | Age of participants | Data sources and years |
| --- | --- | --- | --- | --- |
| 9 | Gonçalves et al., (2017)29 | three domains: Biological domain; Psychological domain; Social domain | >55 | the Aging Profiles of the Portuguese Population and the Survey of Health, Aging and Retirement in Europe .（2005-2006，2011） |
| 10 | Mohammadi et al., (2018)30 | Six factors: Social-institutional participation; Active mind maintenance; Social contacts; Agent attitude; Productive engagement; Physical-functional activity | 60-85 | Local Sample Survey (2005-2006) |
| 11 | Yang, (2018)31 | Four dimensions: Social participation; Independent, Healthy and safe living; Active ageing environment; Competence | >45 | China Health and Retirement Longitudinal Study (2015) |
| 12 | Rantanen et al., (2019)32 | Four dimensions: Goals; Ability; Autonomy; Activity | 65-94 | Local Sample Survey (2018) |
| 13 | Hsu et al., (2019)33 | Four dimensions: Employment; Participation in Society; Independent, Healthy, and Secure Living; Capacity and Enabling Environment for Active Aging | >55 | Local Sample Survey (2017) |
| 14 | Xie, (2019)34 | Four dimensions: Health; participation; security | / | Local Sample Survey (2019) |
| 15 | Li, (2020)35 | Four dimensions: Healthy; Participatory; Safe; Supportive Environment | >60 | Local Sample Survey (2019) |
| 16 | Pham et al.,(2020a)36 | Four dimensions: Voluntary; Politics; Affordability; Well-being | >55 | data from a 2018 survey in three provinces from the northern, central, and southern regions of Vietnam. |

Basic Characteristics of Active Aging Assessment Tool (Continue)

| No. | Author, Year | Dimensions/Factors | Age of participants | Data sources and years |
| --- | --- | --- | --- | --- |
| 17 | Pham et al.,(2020b)37 | Four dimensions: Employment; Social participation; Independent, healthy, and secure living; Capacity and enabling environment for active aging | >55 | data from a 2018 survey of 1,105 older adults in three provinces from the northern, central, and southern regions of Vietnam. |
| 18 | Steinmayr et al., (2020)38 | Nine dimensions:Subjective well-being; Abilities; Social networks; Physical health; Participation in society; Lifelong learning; Money; Housing; Employment | >50 | data from Wave 6 of the Survey of Health, Ageing and Retirement in Europe (SHARE), which was collected in 2015 |
| 19 | Oliveira, (2020)39 | Six factors: Behavioral; Personal; Physical environment; Social; Economic; Social and health services | >60 | Local Sample Survey (2017-2018) |
| 20 | Haque, (2022)40 | Three dimensions:Health dimension; Participation Dimension; Security dimension | >60 | Local Sample Survey (2019) |
| 21 | Bibi et al.,(2023)41 | Seven dimensions: Being self-reliance; Learning, integrated into society; Healthy lifestyle; Developing spiritual wisdom; Economic security; Strengthen family ties; Contribution to society | >60 | Local Sample Survey (2022) |
| 22 | Keeratisiroj et al., (2023)42 | Nine factors: mental/subjective health; physical health; health behavior and chronic disease; vision and hearing; oral health; social participation; stability in life; financial stability; Secure living | >60 | Local Sample Survey (2020) |

Table S4 Basic Characteristics of Active Aging Assessment Tool

| No. | Author, Year | **Sample** | **Reliability** | **Validity** | **Country/Region** |
| --- | --- | --- | --- | --- | --- |
| 1 | Hu, (2012)23 | 206 | Internal consistency, half-confidence | Content validity, structural validity | Chinese |
| 2 | Buys and Miller, (2012)24 | 2620 | Cronbach’s alpha | / | Australian |
| 3 | Zaidi et al., (2012)8 | / | the AAI has been based on outcome indicators, along the lines of Laeken Indicators；z-score methodology, |  | Europe |
| 4 | Paúl et al., (2012)25 | 1322 | Confirmatory Factor Analysis; Exploratory Factor Analysis. | / | Portuguese |
| 5 | Tareque et al,. (2014)26 | 896 | Amethod to adjust each composite for the answer range of each indicator and for the total number of indicators in the composite.an index of each dimension was constructed followingthe Human Development Index (HDI)。 | / | Bangladesh |
| 6 | Thanakwang et al., (2014)12 | 500 | Internal consistency reliability: internal consistency, item analysis; Test–retest reliability | content validity;construct validity | Thai |
| 7 | Marsillas et al., (2017)27 | 404 | composite reliability indicator | Validity of the formative construct was tested by ensuring that weights were roughly equal | Spain |
| 8 | Zhang, (2017)28 | 350 | Internal consistency reliability; retest reliability | Content validity; calibration validity; structural association validity | Chinese |
| 9 | Gonçalves et al., (2017)29 | 4400 | / | / | Portuguese |
| 10 | Mohammadi et al., (2018)30 | 350 | internal consistency and test-retest | content validity | Iranian |
| 11 | Yang, (2018)31 | >1000 | Hierarchical analysis, data envelopment | / | Chinese |

Basic Characteristics of Active Aging Assessment Tool (Continue)

| No. | Author, Year | **Sample** | **Reliability** | **Validity** | **Country/Region** |
| --- | --- | --- | --- | --- | --- |
| 12 | Rantanen et al., (2019)32 | 159 | item response analyses.The reliability indices for all the subscales and the total scale were ≥0.68. Test–Retest Repeatabilit (ICC > 0.886;kappa coefficients). Focus Group Interviews. | Pearson Correlation Coefficients | Finland |
| 13 | Hsu et al., (2019)33 | 738 | rest-retest reliability and internal consistency | face validity | Chinese |
| 14 | Xie, (2019)34 | 437 | / | / | Chinese |
| 15 | Li, (2020)35 | 596 | Delphi expert advice, internal consistency | construct validity | Chinese |
| 16 | Pham et al.,(2020a)36 | 805 | test–retest reliability: (ICC), internal consistency;Cronbach’s alpha | content validity,construct validity, and concurrent validity | Vietnam |
| 17 | Pham et al.,(2020b)37 | 1105 | focus groups,test–retest, internal consistency, | / | Vietnam |
| 18 | Steinmayr et al., (2020)38 | 62899 | Principal Component Analysis | / | Austria |
| 19 | Oliveira, (2020)39 | 957 | / | / | Brazil |
| 20 | Haque, (2022)40 | 518 | / |  | Bangladesh |
| 21 | Bibi et al.,(2023)41 | 160 | Cronbach’s alpha, and Pearson correlation coefficient values; test–retest reliability | criterion validity;discriminatory validity; structured validity;Content validity | Pakistan |
| 22 | Keeratisiroj et al., (2023)42 | 1098 | Exploratory factor analysis (EFA) | content validity | Thailand |
